# Supplementary material for: Effectiveness of interventions to improve health behaviours of health professionals: a systematic review
Source: PubMed Central journal article supplement — BMJ Open. 2022 Sep 26;12(9):e058955. doi: 10.1136/bmjopen-2021-058955 (PMC9516219; doi:10.1136/bmjopen-2021-058955), 2022-09-26
Supplement: bmjopen-2021-058955supp001.pdf [file bmjopen-2021-058955supp001.pdf]

## Supplementary material

### Appendix 1

**Searches:** The following electronic databases will be searched (MEDLINE, Cochrane library, EMBASE, CINAHL). Boolean connectors AND will be used to combine three search categories related to (i) health professionals/students, (ii) intervention and (iii) specific intervention details. Boolean connectors OR will be used to combine search terms within each category.

- I. Search terms related to health professionals include: “health professional\*” OR resident\* OR consultant\* OR registrar\* OR “healthcare professional\*” OR “health student\*” OR “healthcare student\*” OR “healthcare worker\*” OR “health clinician\*” OR “healthcare clinician\*” OR nurse\* OR “student nurse\*” OR “nurse student\*” OR “nurse professional\*” OR doctor\* OR “student doctor\*” OR “doctor student\*” OR “medical professional\*” OR “medical student\*” OR “general practitioner\*” OR dietitian\* OR dietician\* OR “dietician student\*” OR “dietitian student\*” OR “student dietitian\*” OR “student dietician\*” OR “dietetic student\*” OR nutritionist\* OR “nutrition student\*” OR “student nutritionist\*” OR pharmacist\* OR “student pharmacist\*” OR “pharmacy student\*” OR physiotherapist\* OR “physiotherapy student\*” OR “student physiotherapist\*” OR psychologist\* OR “psychology student\*” OR “student psychologist\*” OR “occupational therapist\*” OR “student occupational therapist\*” OR (MH "Nurses") OR (MH "Nurses, Public Health") OR (MH "Nurses, Male") OR (MH "Nurses, International") OR (MH "Nurses, Community Health") OR (MH "Nurse Specialists") OR (MH "Nurses, Pediatric") OR (MH "Nurse Midwives") OR (MH "Nurse Clinicians") OR (MH "Nurse Anesthetists") OR (MH "Nurse Practitioners") OR (MH "Pediatric Nurse Practitioners") OR (MH "Family Nurse Practitioners") OR (MH "Nursing+") OR (MH "Physicians") OR (MH "Urologists") OR (MH "Radiologists") OR (MH "Surgeons+") OR (MH "Oncologists+") OR (MH "Neurologists") OR (MH "Nephrologists") OR (MH "Geriatricians") OR (MH "General Practitioners") OR (MH "Gastroenterologists") OR (MH "Endocrinologists") OR (MH "Dermatologists") OR (MH "Cardiologists") OR (MH "Anesthesiologists") OR (MH "Allergists") OR (MH "Pharmacists") OR (MH "Occupational Therapists") OR (MH "Nutritionists") OR (MH "Anesthetists+") (MH "Medical Staff+") OR (MH "Nursing Staff+") OR (MH "Physical Therapists") OR (MH "Students, Medical") OR (MH "Students, Pharmacy") OR (MH "Students, Nursing")
- i. Search terms related to the intervention include: “randomized controlled trial” OR (MH "Randomized Controlled Trial") OR “controlled clinical trial” OR randomized OR randomised OR randomly OR “pre-post”
- ii. Search terms related to the specific intervention details include: “physical activity” OR exercise OR fitness OR nutrition OR “eating habits” OR “dietary habits” OR “food intake” OR “dietary intake” OR “dietary change” OR “healthy eating” OR “dietary behavior” OR “dietary behaviour” OR eating OR smoking OR “smoking cessation” OR “quitting smoking” OR “quit smoking” OR alcohol OR (MH "Exercise+") OR

(MH "Healthy Lifestyle+") OR (MH "Smoking Cessation") OR (MH "Smoking+") OR (MH "Smoking Reduction") OR (MH "Alcohol Drinking+")
